# Supplementary material
Source: PubMed Central journal article supplement (PMC4136580)
Supplement: 1410893111_pnas.201410893SI.pdf [file 1410893111_pnas.201410893SI.pdf]

# Supporting Information

Lee et al. 10.1073/pnas.1410893111

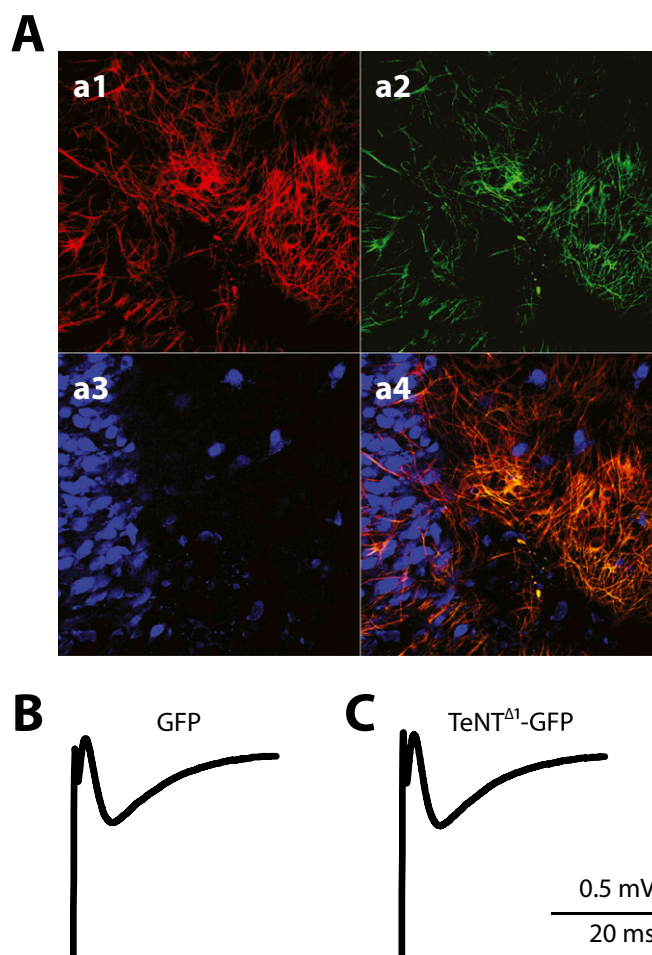

**Fig. S1.** (A) The identity of the infected cells expressing tetanus neurotoxin (TeNT) $\Delta$ <sup>1</sup>-GFP was established by immunofluorescence detection of the astrocytic marker GFAP (a1) or the neuronal marker NeuN (a3). (a2) green fluorescence emitted by TeNT $\Delta$ <sup>1</sup>-GFP. In a4, the merged images are shown. (B) Example of field potential recorded in the CA3 area of a cultured slice infected with lenti-GFP. (C) Example traces of field-excitatory postsynaptic potentials recorded in the CA3 area of a cultured slice infected with lenti-TeNT $\Delta$ <sup>1</sup>-GFP. Stimulation was performed with a bipolar electrode placed in the stratum radiatum of the CA3 area.

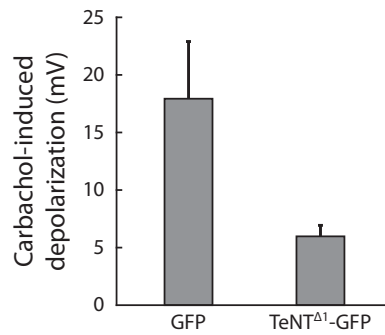

**Fig. S2.** Blockade of gliotransmitters release attenuated the depolarization of pyramidal cells during carbachol application. Figure shows the mean carbachol-induced depolarization ( $6 \pm 1$  mV,  $n = 7$ ) recorded in neurons from slices infected with lenti-TeNT<sup>Δ1</sup>-GFP, compared with slices infected with lenti-GFP only ( $18 \pm 5$  mV,  $n = 6$ ;  $P = 0.02$ , Student *t* test). Error bars represent SEM.

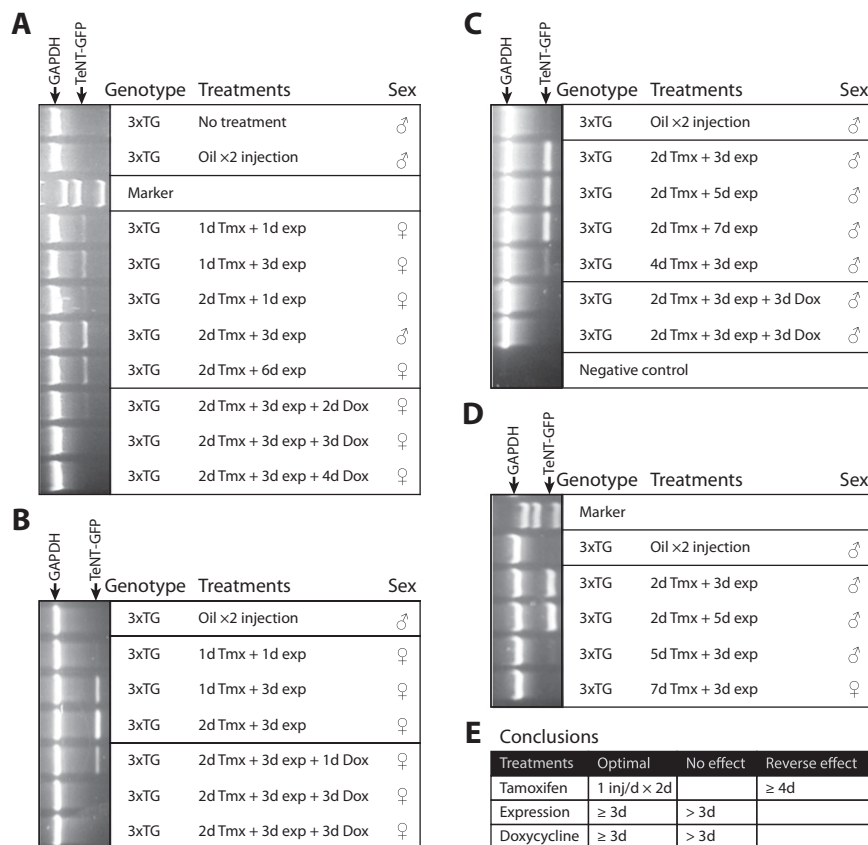

**Fig. S3.** The expression pattern according to tamoxifen injection and doxycycline feeding was extensively examined by RT-PCR. For testing the consistency of the expression pattern, we used RT-PCR under various conditions on the RNA from whole-brain extracts and found the optimal condition for the maximal TeNT expression. (A) Initial experiment of the RT-PCR showed the general expression pattern of the TeNT-GFP and it is further examined repeatedly in B–D. The optimal expression condition was daily i.p. injection of 100  $\mu$ L of tamoxifen (10 mg/mL) for 2 consecutive days. More than three injections showed contrary effects (D). The maximum expression of TeNT could be obtained in 2 d later. The amount of TeNT RNA did not seem to be changed even after 7 d without further injection (C). To prevent any possible complication from the long-term expression of TeNT, all of the experiments were done within 2–3 wk after the TeNT expression. For the suppression of the TeNT expression, the mouse brain with 3 d of doxycycline feeding did not show any TeNT RNA (B). The expression pattern of the TeNT-GFP under tamoxifen and doxycycline is summarized (E). The spatial expression of the TeNT was presumed to be controlled by the hGFAP-tTA and hGFAP-CreERT2 mice lines. These lines were examined previously.
